# Supplementary material for: Circular RNA hsa_circ_0006848 Related to Ribosomal Protein L6 Acts as a Novel Biomarker for Early Gastric Cancer
Source: Hindawi journal article supplement (doi:10.1155/2019/3863458), 2019-09-02
Supplement: f1 [file 3863458.f1.pdf]

**Table S1 Top functions in T1 stage gastric cancer tissues**

| Top Tox Functions                    |                     |            |
|--------------------------------------|---------------------|------------|
| Cardiotoxicity                       |                     |            |
| Name                                 | <i>p</i> -value     | #Molecules |
| Cardiac Dilation                     | 4.19E-02 – 6.10E-04 | 1          |
| Cardiac Arrythmia                    | 1.63E-02 – 1.83E-03 | 1          |
| Tachycardia                          | 9.11E-03 – 9.11E-03 | 1          |
| Hepatotoxicity                       |                     |            |
| Name                                 | <i>p</i> -value     | #Molecules |
| Liver Hyperplasia/Hyperproliferation | 1.65E-01 – 1.32E-02 | 9          |
| Liver Cholestasis                    | 3.54E-02 – 3.54E-02 | 1          |
| Hepatocellular Carcinoma             | 1.34E-01 – 1.34E-01 | 2          |

**Table S2 Top networks in in T1 stage gastric cancer tissues**

| Top Networks |                                                                |       |
|--------------|----------------------------------------------------------------|-------|
| ID           | Associated Network Functions                                   | Score |
| 1            | Cancer, Organismal Injury and Abnormalities, Protein Synthesis | 32    |

**Table S3 Top analysis-ready molecules in T1 stage gastric cancer tissues**

| Expr Fold Change up-regulated   |             |
|---------------------------------|-------------|
| Molecules                       | Expr. Value |
| FGG                             | ↑13.800     |
| LAMA4                           | ↑ 5.371     |
| TPD52L2                         | ↑ 4.473     |
| DPYSL3                          | ↑ 4.123     |
| RNH1                            | ↑ 2.839     |
| NPM1                            | ↑ 2.308     |
| Expr Fold Change down-regulated |             |
| Molecules                       | Expr. Value |
| RPL6                            | ↓ -9.527    |
| UGP2                            | ↓ -7.118    |
| IMMT                            | ↓ -6.107    |
| RPL12                           | ↓ -4.493    |
| CNDP2                           | ↓ -3.804    |
| TUFM                            | ↓ -3.046    |

**Table S4 The exact value of relative expression of has-circ-0006848 in EGC tissues and adjacent non-tumor tissue**

| Number | Tumor( $2^{-\Delta ct}$ ) | Normal( $2^{-\Delta ct}$ ) | Up/down |
|--------|---------------------------|----------------------------|---------|
| 1      | 0.16944083                | 0.192109398                | down    |
| 2      | 0.10283979                | 0.248273124                | down    |
| 3      | 0.105262631               | 0.102948877                | up      |
| 4      | 0.22174447                | 0.27                       | down    |
| 5      | 0.29103754                | 0.25                       | up      |
| 6      | 0.106003419               | 0.376311687                | down    |
| 7      | 0.100798732               | 0.307786103                | down    |
| 8      | 0.11573368                | 0.3536                     | down    |
| 9      | 0.100306888               | 0.535886731                | down    |
| 10     | 0.1786684                 | 0.547146851                | down    |
| 11     | 0.106087223               | 0.297301779                | down    |
| 12     | 0.1000021                 | 0.28                       | down    |
| 13     | 0.1053804                 | 0.090873282                | up      |
| 14     | 0.102524127               | 0.297301779                | down    |
| 15     | 0.103086099               | 0.139660892                | down    |
| 16     | 0.17238969                | 0.24                       | down    |
| 17     | 0.102506691               | 0.566441943                | down    |
| 18     | 0.107546378               | 0.21                       | down    |
| 19     | 0.100333506               | 0.375541818                | down    |

---

|    |             |             |      |
|----|-------------|-------------|------|
| 20 | 0.100100536 | 0.147107024 | down |
| 21 | 0.100844275 | 0.283220971 | down |
| 22 | 0.100874048 | 0.29        | down |
| 23 | 0.100793215 | 0.0476956   | up   |
| 24 | 0.11809742  | 0.283220971 | down |
| 25 | 0.10191293  | 0.343885455 | down |
| 26 | 0.103129179 | 0.190782401 | down |
| 27 | 0.104910208 | 0.441351498 | down |
| 28 | 0.111048543 | 0.570381858 | down |
| 29 | 0.109485898 | 0.078020659 | up   |
| 30 | 0.10579892  | 0.244855074 | down |

---
